# Supplementary material for: ZiYinHuaTan Recipe Inhibits Cell Proliferation and Promotes Apoptosis in Gastric Cancer by Suppressing PI3K/AKT Pathway
Source: Biomed Res Int. 2020 Apr 22;2020:2018162. doi: 10.1155/2020/2018162 (PMC7193275; doi:10.1155/2020/2018162)
Supplement: Supplementary Materials — The supplementary contains chemical components and potential targets of ZYHT and tumor-related targets. 284 kinds of chemical components (sheet 1) in ZYHT were collected from TCMSP, HIT, TCMID, and TCM Database@Taiwan. 294 potential targets (sheet 2) of ZY HT were obtained through the DRAR CPI server, which were demonstrated using UniProt ID. 833 tumor-related targets (sheet 3) were obtained by searching the DrugBank and TTD databases, which were also demonstrated using UniProt ID. [file 2018162.f1.xlsx]

## Sheet: 284components OB DL
Components	OB	DL
cyclo-(val-tyr)	122.79	0.14
cyclo-(leu-tyr)	111.16	0.15
L-Serin	98.47	0.01
(s)-serine	98.47	0.01
OMD	92.44	0.04
homogentisic acid	92.44	0.04
(3S)-3-methyl-2,3-dihydrofuran	87.74	0.01
l-alanine	87.69	0.01
proline	86.46	0.01
DAL	85.17	0.01
valeraldoxime	82.58	0.01
ASI	79.74	0.02
l-asparticacid	79.74	0.02
Thy	74.2	0.02
(2S)-2-amino-3-[(2R)-2-amino-3-hydroxy-3-oxopropyl]disulfanylpropanoic acid	73.59	0.05
Threonin	73.52	0.01
threonine	73.52	0.01
Leucinum	72.92	0.01
IFP	72.87	0.01
methionine	70.87	0.01
D-2-Aminobutyrate	68.78	0.01
2'-(o,m-dihydroxybenzyl)sweroside	68.68	0.08
2-aminobenzoate-3,7-dimethyl-1,6-octadien-3-ol	64.92	0.12
pedatisectine a	64.09	0.16
adenine	62.81	0.03
deacetyl asperuloside acid_qt	62.46	0.11
methyl 2-chloropropenoate	61	0.01
gynesine	60.07	0.03
trigonelline	60.07	0.03
MRY	59.62	0.01
L-Ile	59.05	0.02
DTY	57.55	0.05
(s)-tyrosine	57.55	0.05
Neryl acetate	57.47	0.04
bicyclo[6. 1. 0]non-1-ene	55.31	0.02
4-hydroxybenzyl alcohol	55.19	0.02
FERULIC ACID (CIS)	54.97	0.06
pedatisectine f	53.81	0.06
L-Valin	53.33	0.01
valine	53.33	0.01
Istidina	53.18	0.03
l-histidine	53.18	0.03
HX	52.29	0.04
(R)-()-Citronellal	50.78	0.02
(L)-alpha-Terpineol	48.8	0.03
GLY	48.74	0
glycine	48.74	0
(2S)-2-methyl-3-phenylpropanal	48.59	0.03
.alpha.-Carene	48.01	0.04
β-terpineol	47.89	0.03
O-Methylthymol	47.65	0.04
L-	47.64	0.03
l-arginine	47.64	0.03
ophipogonin D	47.28	0.06
trans-4-(Isopropyl)-1-methylcyclohex-2-en-1-ol	47.06	0.03
(3S,6S)-3-(benzyl)-6-(4-hydroxybenzyl)piperazine-2,5-quinone	46.89	0.27
β-thujene	46.44	0.04
quercetin	46.43	0.28
(-)-alpha-Pinene	46.25	0.05
Clorius	45.99	0.02
cis-p-Coumarate	45.98	0.04
HMF	45.07	0.02
linolenic acid	45.01	0.15
l-Pseudoephedrine	45.01	0.03
(-)-nopinene	44.84	0.05
beta-D-Ribofuranoside, xanthine-9	44.72	0.21
β1-solamargine	44.34	0.1
6-Deoxy-gulose	44.03	0.03
Poriferasterol	43.83	0.76
stigmasterol	43.83	0.76
Eciphin	43.35	0.03
ephedrine	43.35	0.03
p-coumaric acid	43.29	0.04
p-coumaric acid	43.29	0.04
o-Thymol	43.28	0.03
uracil	42.53	0.02
GUN	42.45	0.04
BVE	42.32	0.01
cyclofenchene	42.27	0.07
12,13-epoxy-9-hydroxynonadeca-7,10-dienoic acid	42.15	0.24
EIC	41.9	0.14
phenylalanine	41.62	0.04
Baicalin	40.12	0.75
10,13-eicosadienoic	39.99	0.2
Hemo-sol	39.84	0.02
(R)-linalool	39.8	0.02
(1S,2R)-1-ethyl-2-methylcyclopropane	39.6	0.01
FER	39.56	0.06
3-Demethylcolchicine	39.34	0.57
Octylene	39.25	0.01
1-octene	39.25	0.01
chrysanthemaxanthin	38.72	0.58
Cycloartenol	38.69	0.78
EUG	38.39	0.03
protocatechualdehyde	38.35	0.03
solasodine-3-O-α-L-rhamnopyranosyl-(1→2)-O-[β-D-glucopyranosyl-(1→4)]-β-D-glucopyranoside	38.19	0.06
solasodine-3-O-α-L-rhamnopyranosyl-(1→2)-O-[β-D-glucopyranosyl-(1→4)]-β-D-glucopyranoside	38.19	0.06
2-methoxy-3-methyl-9,10-anthraquinone	37.83	0.21
beta-sitosterol	36.91	0.75
Isopimaric acid	36.2	0.28
24-Ethylcholest-4-en-3-one	36.08	0.76
zoomaric acid	35.78	0.1
(-)-Citronellal	35.71	0.02
Cavidine	35.64	0.81
vanillic acid	35.47	0.04
26-O-β-D-glucopyranosyl-3β,26-dihydroxy-5-cholesten-16,22-dioxo-3-O-α-L-rhamnopyranosyl-(1→2)-β-D-glucopyranoside_qt	35.11	0.81
2,3-dimethoxy-6-methyanthraquinone	34.86	0.26
Methyl palmitelaidate	34.61	0.12
Furol	34.35	0.01
2Z-hexadecenoic acid	34.02	0.1
baicalein	33.52	0.21
regaloside B_qt	33.26	0.16
oleic acid	33.13	0.14
8-Octadecenoic acid	33.13	0.14
Moslene	33.02	0.02
WLN: VHR	32.63	0.01
anethole	32.49	0.03
26-O-beta-D-Glucopyranosyl-3beta,26-dihydroxy-choleslen-16,22-dioxo-3-O-alpha-L-rhamnopyranosyl-(1-2)-beta-D-glucopyranoside_qt	32.43	0.8
26-O-β-D-glucopyranosyl-3β,26-dihydroxy-cholestan-16,22-dioxo-3-O-α-L-rhamnopyranosyl-(1→2)-β-D-glucopyranoside_qt	32.43	0.8
(R)-p-Menth-1-en-4-ol	32.16	0.03
(4aS,6aR,6aS,6bR,8aR,10R,12aR,14bS)-10-hydroxy-2,2,6a,6b,9,9,12a-heptamethyl-1,3,4,5,6,6a,7,8,8a,10,11,12,13,14b-tetradecahydropicene-4a-carboxylic acid	32.03	0.76
3,4,5-trihydroxybenzoic acid	31.69	0.04
coniferin	31.11	0.32
p-MCA	31	0.05
6-shogaol	31	0.14
geniposidie acid_qt	30.96	0.09
cis-Anethol	30.86	0.03
gondoic acid	30.7	0.2
deacetylasperulosidic acid _qt	30.29	0.1
scandoside_qt	30.02	0.1
asperulosidicacid	30.02	0.1
3'-Hydroxyanethole	30.01	0.04
trans-4-Methoxycinnamyl alcohol	30.01	0.04
catechol	29.86	0.02
Decanal	29.81	0.02
ANN	29.69	0.03
succinic acid	29.62	0.01
Tereben	29.62	0.02
L-Lysin	29.33	0.02
hydroquinone	29.26	0.02
coumarin	29.17	0.04
oleanolic acid	29.02	0.76
1-alpha-Terpinyl acetate	28.97	0.05
Scopoletol	27.77	0.08
E-6-O-p-methoxycinnamoyl scandoside methyl ester	27.12	0.81
Methylpyrazine	27.1	0.01
Glycerol palmitate	26.66	0.22
L-alpha-Palmitin	26.66	0.22
Geraniol formate	26.47	0.03
1H-2,6-dioxacyclopent(cd)inden-1-one, 4-((acetyloxy)methyl)-5-(beta-D-glucopyranosyloxy)-2a,4a,5,7b-tetrahydro-, (2aS-(2aalpha,5alpha,7balpha))-	26.43	0.71
2-hydroxy-3-methylanthraquinone	26.09	0.18
genipin	26.06	0.1
NERYLACETATE	25.94	0.04
heptadecanoic acid 2,3-dihydroxy-propyl ester	25.9	0.26
caffeic acid	25.76	0.05
beta-elemene	25.63	0.06
protocatechuic acid	25.37	0.04
WLN: Q5Q	24.8	0.01
Emodinanthrone	24.72	0.21
emodin anthrone	24.72	0.21
emodin	24.4	0.24
gamma-aminobutyric acid	24.09	0.01
gamma-aminobutyric acid	24.09	0.01
DUR	23.69	0.09
dauricine	23.65	0.37
5,8-epidioxyergosta-6,22-dien-3-ol	22.71	0.82
27-O-(3-hydroxy-3-methylglutaroyl)-isonarthogenin-3-O-α-L-rhamnopyranosyl-(1→2)-O-[β-D-glucopyranosyl-(1→4)]-β-D-glucopyranosid_qt	22.1	0.4
brownioside_qt	22.1	0.4
guanosine	21.43	0.21
alpha-Ocimene	21.43	0.02
darutoside	21.32	0.63
Stigmasta-5,22-dien-3-O-.beta.-D-glucopyranoside	21.32	0.63
stigmasterol-3-O-β-D-glucopyranoside	21.32	0.63
soya-cerebroside i_qt	21.22	0.51
soya-cerebroside ii_qt	21.22	0.49
GR	20.9	0.21
lilioside C	20.84	0.1
N-(5-methylisoxazol-3-yl)acetamide	20.82	0.02
daucosterol	20.63	0.63
Sitogluside	20.63	0.62
Hex-3-enyl acetate	20.28	0.02
PENTADECYLIC ACID	20.18	0.08
3-hydroxy-1-methoxy-2-methyl-9,10-	20.03	0.23
adenosine	19.85	0.16
Amide HPL	19.79	0.1
9-Oxononanoic acid	19.6	0.03
Geniposidic acid	19.59	0.41
Neral	19.48	0.02
Digitolutein	19.36	0.23
palmitic acid	19.3	0.1
(5R)-5-hydroxy-1-(4-hydroxy-3-methoxyphenyl)tetradecan-3-one	19.14	0.28
OYA	19.07	0.01
Ethylpalmitate	18.99	0.14
Norharman	18.88	0.08
Crysophanol	18.64	0.21
1-Hydroxy-7-methoxy-3-methyl-anthraquinone	18.44	0.24
24-Methylcholesta-5,7,22-trien-ebelta-ol	18.22	0.72
oleanolic acid-3-O-β-D-glucuronopyranoside_qt	17.93	0.76
1-[(2R,3R,4S,5S)-3,4-dihydroxy-5-(hydroxymethyl)oxolan-2-yl]pyrimidine-2,4-dione	17.85	0.11
stearic acid	17.83	0.14
ursolicacid	17.7	0.75
Mnk	17.66	0.03
solasonine_qt	16.88	0.81
ursolic acid	16.77	0.75
ursolic acid	16.77	0.75
Ethyl icosanoate	16.67	0.25
Barolub	16.29	0.22
Cedrol	16.23	0.12
3-O-beta-D-Glucopyranosyl betulinic acid-28-O-beta-D-glucopyranosyl-(1-6)-beta-D-glucopyranoside_qt	16.21	0.78
Henicosanoic acid	16.14	0.23
3,6'-O-diferuloylsucrose	15.86	0.51
ophipogonin D_qt	15.84	0.81
methyl eicosanoate	15.79	0.22
Docosanoate	15.69	0.26
regaloside B	15.63	0.51
(2R)-2-acetamidoglutaric acid	15.5	0.04
E-6-O-p-methoxycinnamoyl scandoside methyl ester_qt	14.44	0.51
9-Heptadecanol	14.24	0.09
1-O-feruloylglycerol	14.18	0.13
regaloside F_qt	14.18	0.13
regaloside F	13.78	0.54
26-O-β-D-glucopyranosyl-nuatigenin-3-O-α-L-rhamnopyranosyl(1→2)-β-D-glucopyranoside_qt	13.28	0.79
deacylbrownioside_qt	13.07	0.79
regaloside D_qt	12.81	0.1
Eicosanol	12.1	0.16
26-O-β-D-glucopyranosyl-nuatigenin-3-O-α-L-rhamnopyranosyl(1→2)-β-D-glucopyranoside	11.94	0.02
colchicoside	11.73	0.83
26-O-β-D-glucopyranosylnuatigenin-3-O-α-L-rhamnopyranosyl(1→2)-o-[β-D-glucopyranosyl(1→4)]-β-D-glucopyranoside_qt	11.64	0.24
protocatechuic acid-3-glucoside	11.51	0.22
Oleanolic acid-28-O-beta-D-glucopyranoside	11.48	0.41
regaloside A	11.38	0.46
THM	11.34	0.11
regaloside D	11.3	0.43
Scandoside methyl ester	11.24	0.48
Scandoside methyl ester	11.24	0.48
inosine	11.17	0.18
3-methyleicosa	10.18	0.15
tetratriacontan-1-ol	10.07	0.44
26-O-β-D-glucopyranosyl-3β,26-dihydroxy-5-cholesten-16,22-dioxo-3-O-α-L-rhamnopyranosyl-(1→2)-β-D-glucopyranoside	10.02	0.1
n-butyl-β-D-fructoufranoside	9.94	0.08
Asperulosidic acid	8.73	0.58
1-methoxy-2-hydroxyanthraquinone	8.7	0.21
LFA	8.46	0.13
26-O-beta-D-Glucopyranosyl-3beta,26-dihydroxy-choleslen-16,22-dioxo-3-O-alpha-L-rhamnopyranosyl-(1-2)-beta-D-glucopyranoside	8	0.09
regaloside E_qt	7.84	0.19
1,2,3,4,6-penta-o-galloyl-β-d-glucose	7.8	0.13
3-O-beta-D-Glucopyranosyl betulinic acid-28-O-beta-D-glucopyranosyl-(1-6)-beta-D-glucopyranoside	7.79	0.06
deacylbrownioside	7.51	0.09
26-O-β-D-glucopyranosylnuatigenin-3-O-α-L-rhamnopyranosyl(1→2)-o-[β-D-glucopyranosyl(1→4)]-β-D-glucopyranoside	7.5	0.01
brownioside	7.5	0.04
Ethyl linolelaidate	7.33	0.19
regaloside E	7	0.55
isolariciresino	6.96	0.39
beta-sitosterol-3-o-beta-d-xylopyranoside	6.95	0.71
beta-Sitosterol-3-O-beta-D-xylopyranoside	6.95	0.71
Quercetin 3-beta-D-galactopyranoside	6.94	0.77
asperuloside_qt	6.86	0.17
Gulutamine	6.66	0.02
β-sitosterol	5.84	0.71
campesterol	5.57	0.72
panasenoside	4.51	0.71
Deacetyl asperulosidic acid methyl ester	4.29	0.48
Stigmasterol-beta-D-glucoside	4.08	0.85
soya-cerebroside i	3.86	0.37
soya-cerebroside ii	3.86	0.35
(+) isolariciresinol 9-o-β-d-glucopyranoside	3.83	0.84
geniposide	3.78	0.44
26-O-β-D-glucopyranosyl-3β,26-dihydroxy-cholestan-16,22-dioxo-3-O-α-L-rhamnopyranosyl-(1→2)-β-D-glucopyranoside	3.78	0.1
(1S,4aS,5R,7aS)-5-hydroxy-7-methylol-1-[(2S,3R,4S,5S,6R)-3,4,5-trihydroxy-6-methylol-tetrahydropyran-2-yl]oxy-1,4a,5,7a-tetrahydrocyclopenta[d]pyran-4-carboxylic acid	3.55	0.45
deacetylasperulosidic acid	3.42	0.45
Quercetin 3-O-beta-D-glucosyl-(1->2)-beta-D-glucoside	3.37	0.67
DL-Glucuronic acid	3.35	0.04
rutin	3.2	0.68
Quercetin, 3-(6-0-(6-deoxy-alpha-L-mannopyranosyl)-beta-D-glucopyranoside)	3.2	0.68
Quercetin, 3-(6-O-alpha-L-rhamnopyranosyl-beta-D-glucopyranoside)	3.2	0.68
Kaempferol 3-O-beta-D-galactoside	3.1	0.74
27-O-(3-hydroxy-3-methylglutaroyl)-isonarthogenin-3-O-α-L-rhamnopyranosyl-(1→2)-O-[β-D-glucopyranosyl-(1→4)]-β-D-glucopyranosid	3.01	0.02
kaempferol-3-O-β-D-galactopyranoside	2.77	0.74
Spantol	2.42	0.04
Quercetin 3-O-.beta.-D-glucopyranoside	1.86	0.77
Quercetin-3-O-glucopyranoside	1.86	0.77
Quercetin 3-O-alpha-L-rhamnoside	1.66	0.74
choline	0.47	0.01
N,N-Dimethylconiine	0.19	0.03

## Sheet: 294 targets of ZYHT
294 targets of ZYHT
P10276
P00915
P28482
P24941
P17752
O60674
P49773
Q07912
P51659
P78368
P12931
P08311
P06239
P00519
P15309
P15056
P00533
P09417
P47929
Q03013
O15530
P49759
P00374
Q07869
Q15788
Q99714
P31749
P49841
Q04828
P11766
P52895
P05121
Q02127
P15291
P49761
P02774
P43155
Q9UGC6
P14061
P48147
O14965
P49638
O75469
P11597
P08263
P41240
Q9UKL6
P11586
Q8IXJ6
O75828
P04406
P06702
P12319
Q9P0U3
Q05315
P00488
Q00796
P22301
P23368
P07900
P09874
P07327
P45983
P09601
P00966
Q16772
P11413
Q16881
O14732
P06276
P07858
P04629
Q06520
P23284
P07339
P09211
P12429
P29317
Q08257
P15559
P27487
P23381
P17707
P12643
P36894
P08473
P00918
P67870
P68400
P48059
P78423
P60033
Q9BYF1
P28845
Q969G6
P12268
P01009
Q9NXA8
P32320
P00439
P06126
P61769
P62942
P14778
P24752
Q16620
Q03181
P54577
Q8NHL6
P09960
P04035
P00797
P00387
P28702
Q13133
Q15596
P49327
Q9NRN7
Q9NQU5
P53582
P20839
P00736
P35520
P34913
P56524
P20701
Q16836
Q13153
P52333
P03950
O60760
P19793
Q14994
P37231
Q15119
O15540
P14555
P11245
P18075
Q13253
P17931
P50440
P23946
P08069
P08246
P29466
P09871
P22303
P42330
P06729
P30043
P34896
P17900
Q9Y696
O14745
P00441
P04181
P11362
Q14790
P63104
P21549
P14210
P78417
P28161
P07451
P20132
P01308
P09488
Q16288
Q9NVS9
P56470
P42574
P55210
P27540
P00747
P43405
Q04760
Q9NP99
P43489
Q12933
P05112
P02766
P30613
P04637
Q93009
P16070
P56199
Q13526
Q04609
P19438
P80188
P10599
P68106
P08519
P13598
O43570
P11926
P32119
P16083
P02768
P29373
P21802
P53779
P00742
P08833
Q15418
Q9Y5Y6
P48637
P12821
Q9P2T1
P15121
P32927
P29372
P53350
P07741
Q9Y3R4
Q9P286
P17735
Q16773
P04183
P00325
P00326
Q13126
P31751
P00749
P27986
P27169
P04062
P49137
P35228
P17612
P30711
P0CG30
Q08499
P27815
P16455
P05981
P22894
P04070
Q9UNN8
P00740
Q14376
O14727
P04278
P27338
P15153
P52566
P01112
P12277
P09467
P14174
P53355
Q13303
P00338
O00204
P49888
P11388
P10826
P06737
P13631
P21397
P40394
P00390
P03952
P07195
P08559
P11177
P50120
P08709
P13726
O75891
P55055
O76054
P51580
P21964
P00491
P31939
P10275
P16435
Q8WUI4
P40261
P19971
P0DMV8
P11473
P63316
Q13285
P05187
Q16539
P62805
Q9NQR1
P60174
P15090
P0CG48
P54578

## Sheet: 833 tumor-related targets
833 tumor-related targets
P05093
O15120
P04035
P18405
P31213
O15530
P25398
Q99707
Q13641
P08253
P11021
P14780
P00519
Q07912
P37023
O14672
Q9UKF2
P0DMS8
P35318
P31749
P31751
Q9Y243
P42330
Q9UM73
P05186
P16234
P06756
P05067
P10275
P03950
Q4VCS5
Q15389
O15123
O95994
Q07817
P10415
P16050
P09917
P35869
Q7L266
Q12797
Q59711
O14965
Q13072
P46663
P30411
O15392
P35613
P55061
Q92843
Q16189
P35222
Q96RI1
P11836
P28336
P32247
P15056
P51587
Q6UXE8
P27708
P22223
P62158
P10644
P40376
P00915
P00918
P22748
Q16790
P23280
O43570
P06731
P40199
P19138
O15519
P07339
P43235
O60911
Q03135
Q92793
P32246
Q07011
P26842
P09693
Q9NPF0
P28906
P11049
P28907
P08174
P25445
P06493
P24941
P11802
Q00535
Q00534
P50613
P49336
P50750
Q99795
P82980
P04637
Q02224
Q9NXG0
P14921
O00408
P32238
P35790
Q53GD3
P49585
P01233
P11717
P68400
P56856
O14493
P10909
P45452
P08603
Q6UXN8
P61073
Q14061
P11511
Q16678
P16435
Q9GZX7
P47712
P16410
Q9NR61
P27707
P49366
P06968
P32926
P00374
Q9NR28
P13922
Q02127
Q12882
Q9UBC3
O76075
O00273
P40692
P54277
Q06609
Q969P6
Q02880
P27695
P23025
P26358
P20039
Q02750
Q13163
O14733
P33981
Q13191
Q9UHF1
Q9Y5P9
P17813
P14625
Q9HCU0
P39060
P25101
Q96CG0
Q15910
P51671
P29317
P29323
P54760
P00533
P12830
Q69128
P14061
P03372
Q92731
P50548
O14980
Q9NPI8
P14324
P49354
Q16658
P49327
Q8CCS5
P12314
P08637
P22830
P02751
Q05397
P15328
Q05932
Q12778
P15407
O15218
Q9BY21
P24385
P21217
P09382
P17931
Q92820
O76070
P48165
P01350
P32239
P30550
P18898
O95749
Q04609
P48507
O60760
P04406
P49840
P01215
P05106
P51654
P49915
Q16706
P01148
P30968
Q9H490
Q96F58
P28799
P01112
O60262
P25092
Q99075
Q12988
Q8III6
P07900
Q15465
Q9Y251
Q14512
P26662
Q04756
P08581
P51858
Q9UK79
Q9GZT9
P25025
P04629
P30825
P42357
Q09472
Q13547
Q969S8
Q92769
P56524
Q9BY41
P16190
Q92826
Q99801
P06465
Q9Y5Y7
Q16665
P05362
P17181
P18065
Q14164
Q7Z7D3
P24071
Q07820
Q13489
Q13490
P49058
P08833
P24592
P08069
P01343
P01344
P05019
P17301
P08648
P01563
P01566
P01574
Q16542
P01583
P29459
P78552
Q14627
Q13261
P14784
Q5VWK5
P24394
P16871
P03956
Q9GZS9
P23458
Q92905
P49862
Q9UBP8
P52732
P01042
P55040
Q08431
P18627
Q13751
Q13753
P09960
Q15722
O95969
O75581
P22888
P36941
P07948
O60341
Q99062
P39900
P14174
Q13296
P53778
P36952
P10721
P09237
P50281
P36507
Q13233
P43355
P43357
P43358
Q9UBF1
P15529
P41217
O14731
Q13421
Q8SR45
P50579
P16455
P27816
P21741
P45983
P45984
Q02779
Q16584
Q9Y2U5
Q99759
Q9Y6R4
P80192
Q9UNH0
Q9JIW5
P30304
P30305
P30307
P46013
P10398
Q96GD4
Q8NI51
Q13542
P21860
P06730
P10070
O75908
P04114
Q00987
P41134
P98170
P01116
P42898
P10242
P01106
P16066
P53350
P17252
P04049
P40763
O14746
P01137
P61812
Q14872
P15941
P08183
Q92887
P05164
Q9Y3Q0
P15559
P08473
P19022
P29120
P16519
O14786
O60259
P30989
P43490
P29474
P04198
Q96S42
P46531
Q04721
Q9UM47
P16083
Q16236
P19838
Q00653
Q96L73
Q9Y6Q9
Q13772
P19338
P06748
P78358
Q9H255
O60890
Q9NZT2
Q8N0R1
Q15466
P23510
Q13133
P30559
P41231
O96013
Q9WJB2
Q03431
Q15116
Q13526
Q15063
P30536
Q13162
P37231
Q16875
P42336
P42338
P48736
Q07326
P49763
P05121
P16284
P01127
P21246
Q9NYY3
P09874
Q9NPC2
P06401
Q16342
Q9NZQ7
P01236
P16471
O43490
Q02297
P35354
O95238
P07288
O43653
Q86X55
P49356
Q56921
P05129
P41743
Q05513
Q15139
P67775
Q8IVN5
P41221
P28300
Q06124
P11309
P01100
P12931
P14618
Q7KZ06
P04626
Q15303
P13232
P35243
Q9BYZ8
P00797
Q9BZR6
P10826
P19793
P48443
P40394
O75116
P25791
P08543
P31350
P23443
Q969K3
Q9UBF6
P9WGZ1
Q04912
P08922
Q13761
P26447
P17707
Q9H0K1
Q9BMI9
Q6FHJ7
P16581
P34897
P05981
Q13535
P08129
P42345
O75830
P25063
Q8NFT2
Q96DU3
Q9H5Y7
Q99835
Q92911
P11166
P30874
Q13309
O60906
Q9NRA0
Q99500
Q01082
Q9NY15
P52823
Q9UHE8
P11474
P08842
P48061
P08254
P24347
P00441
P00448
Q9H1R7
Q9Y5Y6
P56279
P06127
P13385
P36897
P37173
P10599
P30044
C4LW95
Q9QNF7
P19971
P04818
P35590
P50591
Q9NP84
Q9Y2C9
Q9NYK1
Q9NR96
P05412
P02787
P01117
P61586
P01121
Q9H1D0
O15393
Q9H4B7
Q13509
Q9BQE3
P78395
O14788
P29965
O00220
O14763
P08138
P25942
P28908
O75896
P16422
Q4ACW9
P29597
Q13882
P30530
Q9NUW8
O15116
O75604
Q93009
P40818
Q96LR5
Q05086
Q03405
P00749
P11684
O96703
O43915
P35968
P01282
P15692
P11473
P30291
P19544
O95389
P43403
Q15072
Q13433
O00206
O00329
O14684
O14757
O14793
O15111
O15455
O39644
O43497
O60603
O60674
O60732
O75473
O76074
O95180
O95388
O96017
P00742
P00747
P00936
P01008
P01374
P01375
P01579
P01584
P01589
P01730
P02649
P02749
P02768
P03366
P04141
P04156
P04792
P05023
P05108
P05112
P05217
P05556
P05771
P06239
P06241
P06729
P07437
P07766
P07947
P07949
P08100
P08235
P08519
P08709
P08727
P08887
P09038
P09601
P09603
P09619
P09919
P10276
P10912
P11362
P11876
P11926
P13500
P13726
P14210
P14416
P14635
P14902
P15121
P15391
P15509
P15538
P16070
P16473
P17811
P17948
P18314
P20273
P20648
P21439
P21453
P21554
P21589
P21802
P21926
P22102
P22303
P22455
P22607
P23219
P23945
P24530
P24752
P24821
P25103
P25106
P25116
P25774
P26441
P27361
P27448
P28482
P29279
P30872
P31391
P31645
P32745
P32970
P33527
P34972
P35225
P35228
P35346
P35348
P35367
P35372
P35568
P35916
P36888
P40198
P41146
P41597
P42574
P43088
P43116
P47989
P48357
P49765
P49841
P55211
P60568
P68871
P78348
P78527
P78536
P78540
P87764
Q02763
Q05655
Q06187
Q06278
Q12809
Q12884
Q13126
Q13224
Q13418
Q13464
Q14116
Q14626
Q14790
Q16539
Q69617
Q8TBC4
Q8WW43
Q92847
Q969F8
Q96EB6
Q99665
Q99720
Q99973
Q9NY91
Q9UBN7
Q9UBS5
Q9ULX7
Q9UQB9
Q9XZT6
Q9Y624
Q92830
Q8I566
Q14627
Q04721
P9WGY9
P69905
P50579
P42338
P40189
P36507
P29460
P28702
P18084
P14784
P14151
P0A547
P05556
P05106
P04085
P01570
P01116
O75899
Q9UM47
P9WGY7
P48443
P31785
P16109
P05015
P01111
P00374
O95251
O00329
Q99466
Q92794
P9WGY5
P48736
P01571
P00379
Q92993
P0ABQ4
P01568
Q92831
P16184
P01562
Q9H7Z6
Q27793
P01563
Q8WYB5
Q8I372
P05014
Q9HBH1
P01569
P05013
P01567
P32881
P15428
Q96Q83
Q5XXA6
Q9UNQ0
P07686
Q99828
P17612
P11509
P10632
P04075
P51161
Q99527
P07864
Q9UJU2
P07333
Q7L5Y9
D4Q8H0
Q8WXI7
O95298
P80303
P60484
P15309
P28062
Q02156
P05109
P06702
P63244
P62745
P04279
Q8N695
P50225
O00142
Q7Z2W7
P04155
P25311
